# Supplementary material for: Tailored for simplicity: creating high porosity, high performance bio-based macroporous polymers from foam templates
Source: Royal Society of Chemistry journal article supplement (doi:10.1039/c3gc41807c), 2013-11-20
Supplement: c3gc41807c.pdf [file c3gc41807c.pdf]

Supplementary information S1

$$P = \frac{V_{air}}{V_{foam}} = \frac{\frac{m_{air}}{\rho_{air}}}{\frac{m_{air} + m_{polymer}}{\rho_{foam}}} = \frac{m_{air}}{m_{air} + m_{polymer}} \left[ \frac{\rho_{foam}}{\rho_{air}} \right]$$

$$\rho_{air} P m_{air} + \rho_{air} P m_{polymer} = \rho_{foam} m_{air}$$

$$\Rightarrow m_{air} = \frac{\rho_{air} P m_{polymer}}{\rho_{foam} - \rho_{air} P}$$

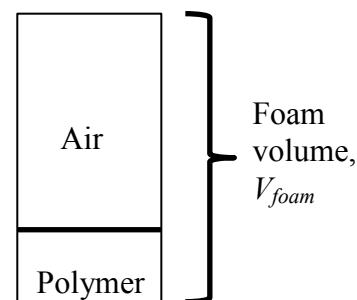

The volume occupied by air is previously occupied by water (assume ideal):

$$V_{air} = V_{water}$$

$$\Rightarrow \frac{m_{air}}{\rho_{air}} = \frac{m_{water}}{\rho_{water}}$$

$$\Rightarrow m_{water} = \left( \frac{\rho_{water}}{\rho_{air}} \right) m_{air}$$

$$\Rightarrow m_{water} = \left( \frac{\rho_{water}}{\rho_{air}} \right) \times \left( \frac{\rho_{air} P m_{polymer}}{\rho_{foam} - \rho_{air} P} \right) = \frac{\rho_{water} P m_{polymer}}{\rho_{foam} - \rho_{air} P}$$

The energy required to heat the mass of water up is:

$$Q = m_{water} \int C_{p,water} dT$$

Assuming constant heat capacity of water

$$Q = m_{water} C_{p,water} \Delta T$$

$$\Rightarrow Q = \frac{\rho_{water} P m_{polymer}}{\rho_{foam} - \rho_{air} P} \times C_{p,water} \Delta T$$

$$\therefore \frac{Q}{m_{polymer}} = \frac{\rho_{water} P}{\rho_{foam} - \rho_{air} P} \times C_{p,water} \Delta T$$

→ assume: 80% porosity and foam density of  $200 \text{ kg m}^{-3}$ , neglecting heat and mass transfer effects

$$\frac{Q}{m_{\text{polymer}}} = \frac{1000 \times 0.8}{200 - 1.3 \times 0.8} \times 4.2 \times (80 - 25)$$
$$\therefore \frac{Q}{m_{\text{polymer}}} = 929 \text{ kJ kg}^{-1}$$

### Abbreviation

$V_{\text{air}}$  = volume of air,  $V_{\text{foam}}$  = volume of foam,  $V_{\text{water}}$  = volume of water,

$\rho_{\text{foam}}$  = foam density,  $\rho_{\text{air}}$  = air density,  $\rho_{\text{water}}$  = water density,

$m_{\text{air}}$  = mass of air in the foam,  $m_{\text{polymer}}$  = mass of polymer in the foam,

$m_{\text{water}}$  = mass of polymer in the foam,  $Q$  = energy requirement

$P$  = porosity,  $C_{p,\text{water}}$  = heat capacity of water,  $dT$  = temperature difference
